# Supplementary material
Source: PubMed Central journal article supplement (PMC8429585)
Supplement: 41386_2021_1091_MOESM1_ESM.pdf [file 41386_2021_1091_MOESM1_ESM.pdf]

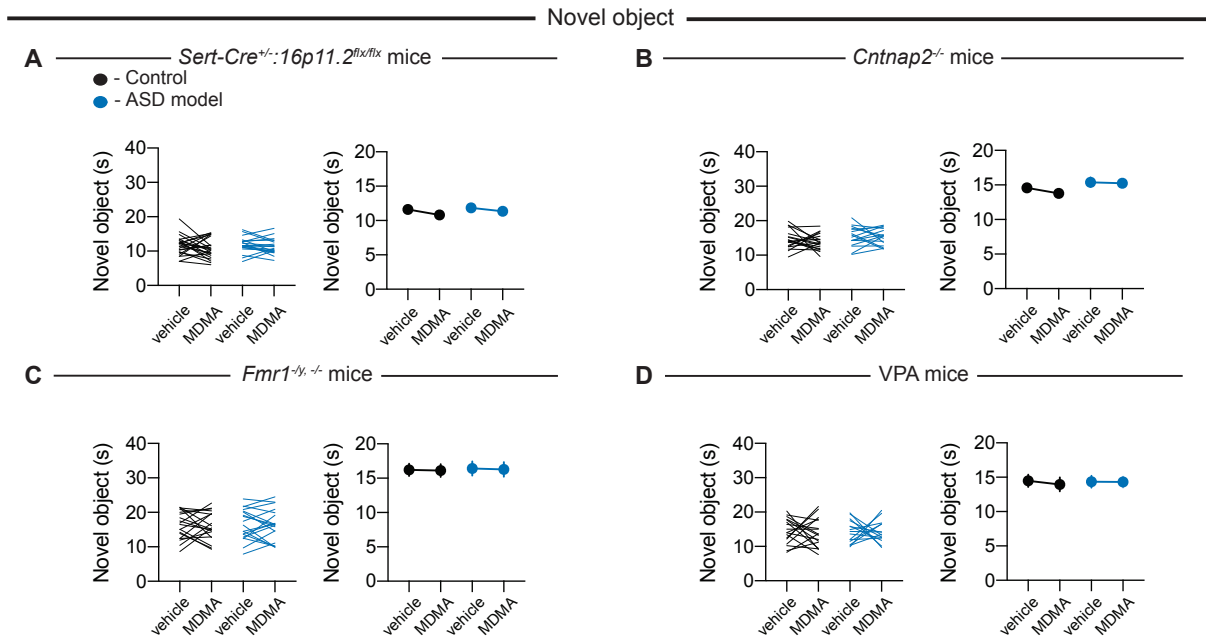

**Figure S1| Systemic administration of MDMA does not alter novel object interaction in four mouse models for ASD.** **A** Quantification of novel object interaction in control and *Sert-Cre<sup>+/+</sup>:16p11.2<sup>flx/flx</sup>* mice with systemic administration of vehicle or MDMA ( $F_{1,42}=0.09315$ ,  $P=0.7617$ ,  $n=20-24$ ). If error bars are not clearly visible, they are smaller than the symbol used to represent the s.e.m. **B** Quantification of novel object interaction in control and *Cntnap2<sup>-/-</sup>* mice with systemic administration of vehicle or MDMA ( $F_{1,33}=0.2790$ ,  $P=0.6009$ ,  $n=16-19$ ). **C** Quantification of novel object interaction in control and *Fmr1<sup>-/y, -/-</sup>* mice with systemic administration of vehicle or MDMA ( $F_{1,36}=0.0018$ ,  $P=0.9668$ ,  $n=19$ ). **D** Quantification of novel object interaction in control and VPA mice with systemic administration of vehicle or MDMA ( $F_{1,30}=0.0516$ ,  $P=0.8219$ ,  $n=15-17$ ). Data are mean  $\pm$  s.e.m. Two-way ANOVA.

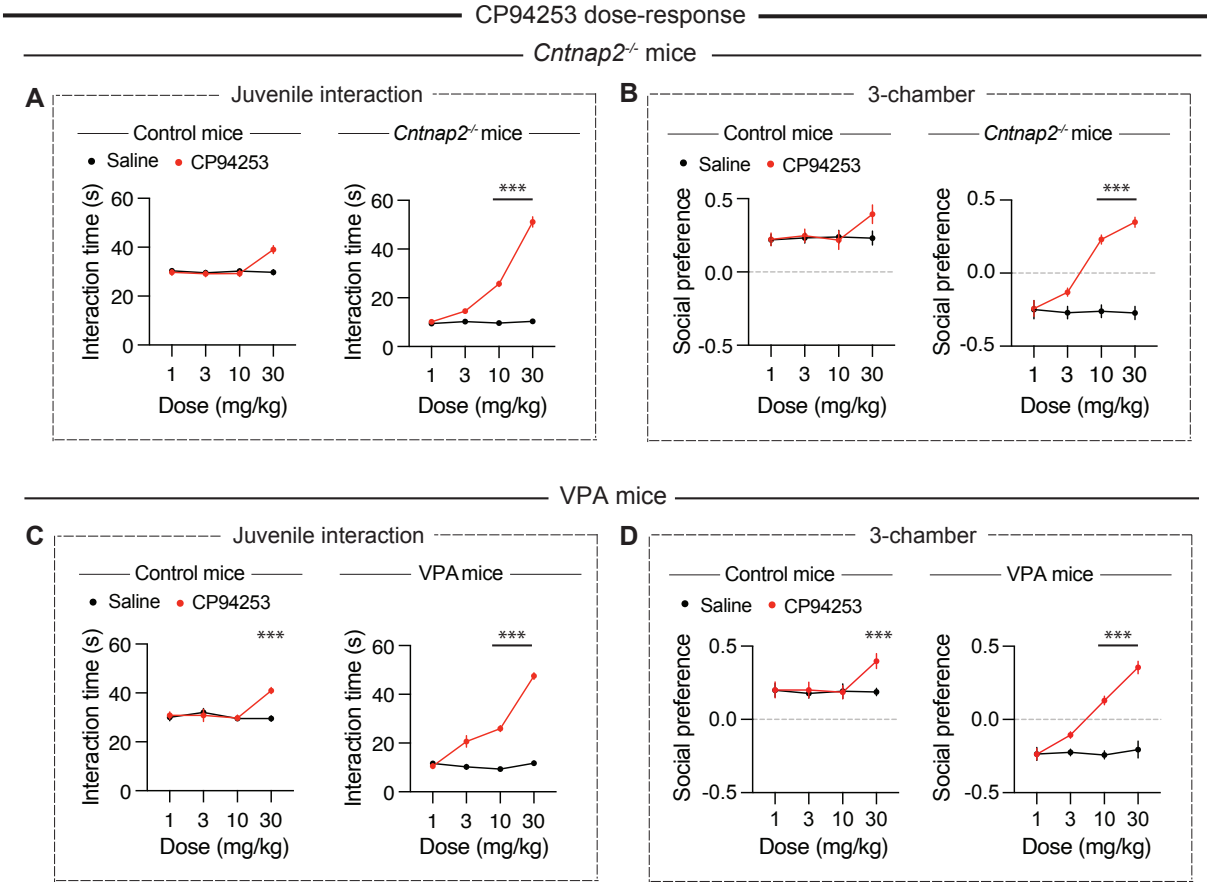

**Figure S2| CP-94,253 administration dose-dependently reverses social deficits present in *Cntnap2*<sup>-/-</sup> and VPA mice.** **A** Quantification of juvenile interaction in control (left) and *Cntnap2*<sup>-/-</sup> (right) mice with systemic administration of vehicle or a progressive dose series of CP-94,253 (1, 3, 10, and 30 mg/kg) ( $F_{9,156}=58.62$ ,  $P<0.001$ ,  $n=14$ ). If error bars are not clearly visible, they are smaller than the symbol used to represent the s.e.m. **B** Quantification of 3-chamber sociability in control (left) and *Cntnap2*<sup>-/-</sup> (right) mice with systemic administration of vehicle or a progressive dose series of CP-94,253 (1, 3, 10, and 30 mg/kg) ( $F_{9,180}=9.563$ ,  $P<0.001$ ,  $n=14$ ). **C** Quantification of juvenile interaction in control (left) and VPA (right) mice with systemic administration of vehicle or one dose of CP-94,253 (1, 3, 10, or 30 mg/kg) ( $F_{7,100}=50.76$ ,  $P<0.001$ ,  $n=13-14$ ). **D** Quantification of 3-chamber sociability in control (left) and VPA (right) mice with systemic administration of vehicle or one dose of CP-94,253 (1, 3, 10, or 30 mg/kg) ( $F_{7,100}=16.59$ ,  $P<0.001$ ,  $n=13-14$ ). Data are mean  $\pm$  s.e.m. \*\*\* $P<0.001$ ; two-way ANOVA with Sidak's multiple comparison post hoc test.

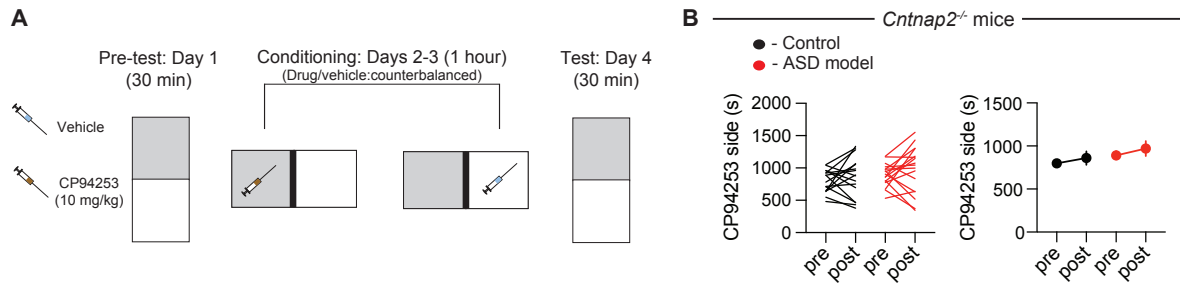

**Figure S3| CP-94,253 administration in control and *Cntnap2*<sup>-/-</sup> mice is not reinforcing. A** Conditioned place preference (CPP) schematic using a single 1 hour pairing of context with CP-94,253 (10 mg/kg). If error bars are not clearly visible, they are smaller than the symbol used to represent the s.e.m. **B** Quantification of preference for CP-94,253-paired side, before and after conditioning in control (black) or *Cntnap2*<sup>-/-</sup> (red) mice ( $F_{1,30}=0.0087$ ,  $P=0.9265$ ,  $n=15-17$ ). Data are mean  $\pm$  s.e.m. Two-way ANOVA with Sidak's multiple comparison post hoc test.

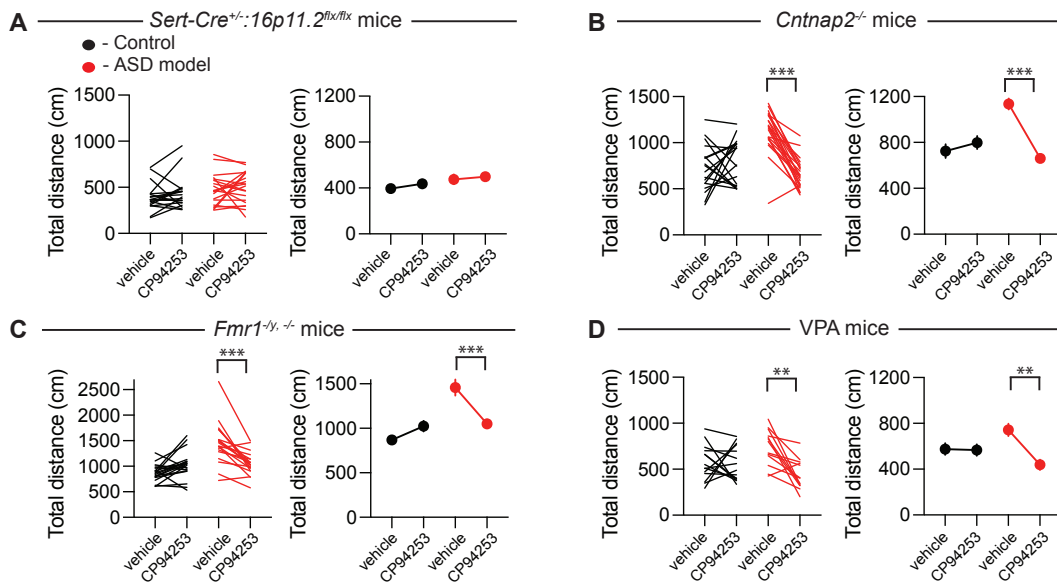

**Figure S4| Systemic administration of CP-94,253 reverses hyperactivity present in three mouse models for ASD.**

**A** Quantification of locomotion in control and *Sert-Cre<sup>+/-</sup>:16p11.2<sup>flx/flx</sup>* mice with systemic administration of vehicle or CP-94,253 ( $F_{1,37}=0.1174$ ,  $P=0.7338$ ,  $n=19-20$ ). If error bars are not clearly visible, they are smaller than the symbol used to represent the s.e.m. **B** Quantification of locomotion in control and *Cntnap2<sup>-/-</sup>* mice with systemic administration of vehicle or CP,94-253 ( $F_{1,39}=35.62$ ,  $P<0.001$ ,  $n=18-23$ ). **C** Quantification of locomotion in control and *Fmr1<sup>-ly-/-</sup>* mice with systemic administration of vehicle or CP-94,253 ( $F_{1,38}=34.55$ ,  $P<0.001$ ,  $n=20$ ). **D** Quantification of locomotion in control and VPA mice with systemic administration of vehicle or CP-94,253 ( $F_{1,25}=7.964$ ,  $P<0.01$ ,  $n=13-14$ ). Data are mean  $\pm$  s.e.m. \*\* $P<0.01$ , \*\*\* $P<0.001$ ; two-way ANOVA with Sidak's multiple comparison post hoc test.

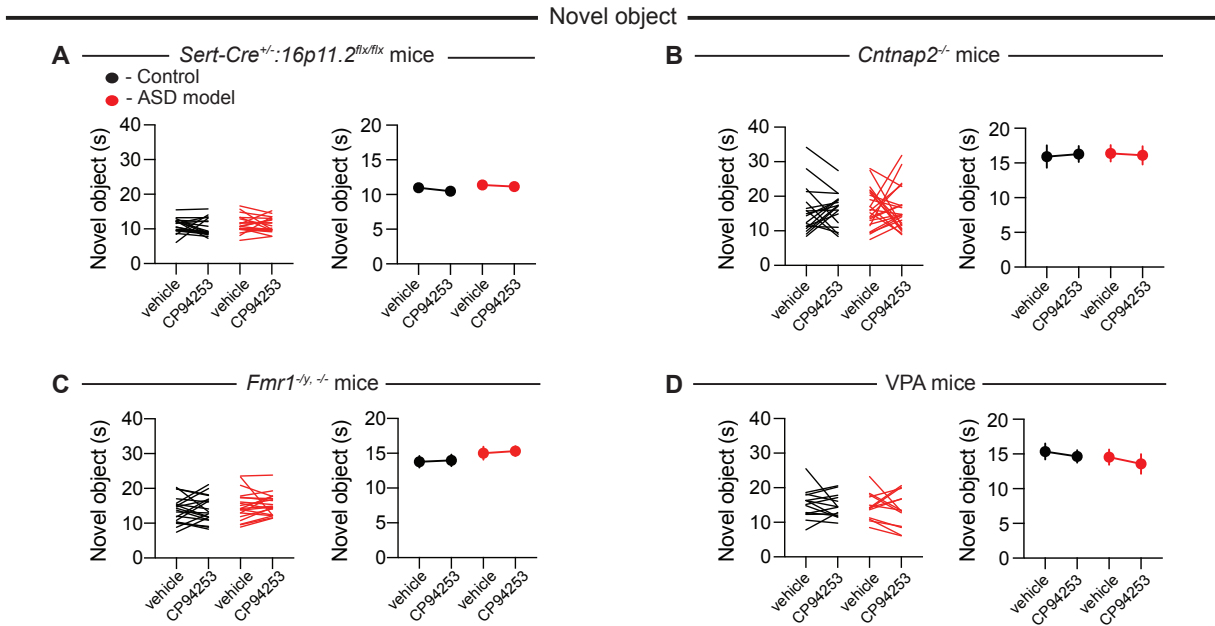

**Figure S5| Systemic administration of CP-94,253 does not alter novel object interaction in four mouse models for ASD. A** Quantification of novel object interaction in control and *Sert-Cre<sup>+/-</sup>:16p11.2<sup>flx/flx</sup>* mice with systemic administration of vehicle or CP-94,253 ( $F_{1,37}=0.09797$ ,  $P=0.7560$ ,  $n=19-20$ ). If error bars are not clearly visible, they are smaller than the symbol used to represent the s.e.m. **B** Quantification of novel object interaction in control and *Cntnap2<sup>-/-</sup>* mice with systemic administration of vehicle or CP,94-253 ( $F_{1,39}=0.07297$ ,  $P=0.7885$ ,  $n=18-23$ ). **C** Quantification of novel object interaction in control and *Fmr1<sup>-ly, -/-</sup>* mice with systemic administration of vehicle or CP-94,253 ( $F_{1,38}=0.01163$ ,  $P=0.9147$ ,  $n=20$ ). **D** Quantification of novel object interaction in control and VPA mice with systemic administration of vehicle or CP-94,253 ( $F_{1,25}=0.0195$ ,  $P=0.8902$ ,  $n=13-14$ ). Data are mean  $\pm$  s.e.m. Two-way ANOVA.

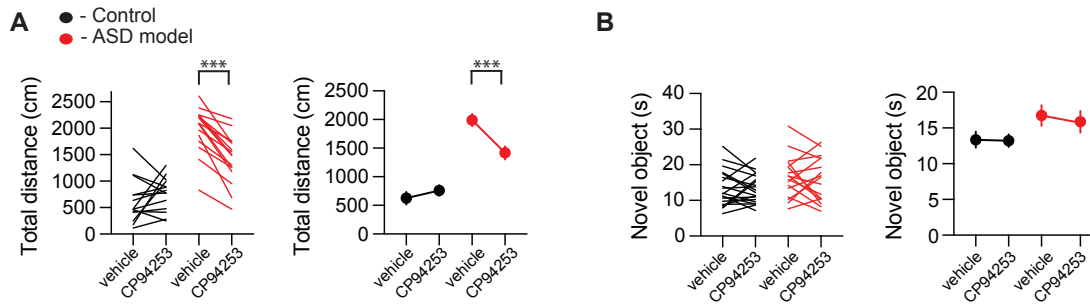

**Figure S6 | Systemic administration of CP-94,253 reverses hyperactivity in *Actl6b*<sup>-/-</sup> mice, but does not alter novel object interaction. **A** Quantification of locomotion in control and *Actl6b*<sup>-/-</sup> mice with systemic administration of vehicle or CP,94-253 ( $F_{1,28}=28.06$ ,  $P<0.001$ ,  $n=14-16$ ). **B** Quantification of novel object interaction in control and *Actl6b*<sup>-/-</sup> mice with systemic administration of vehicle or CP-94,253 ( $F_{1,35}=0.1804$ ,  $P=0.6736$ ,  $n=17-20$ ). Data are mean  $\pm$  s.e.m. \*\*\* $P<0.001$ ; two-way ANOVA with Sidak's multiple comparison post hoc test.**

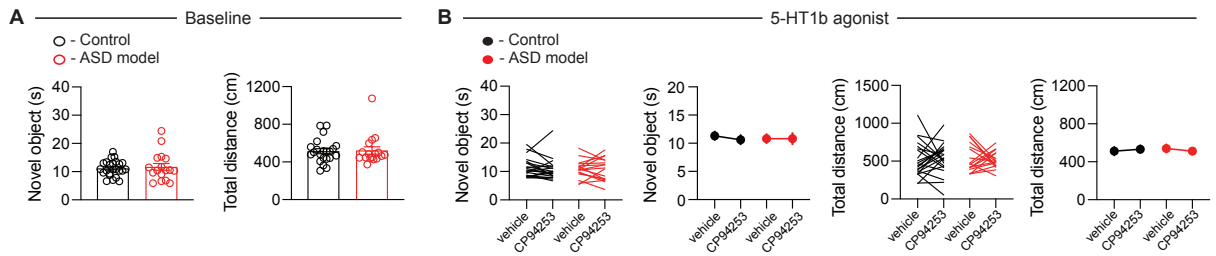

**Figure S7| *Sert-Cre<sup>+/-</sup>:Arid1b<sup>flx/+</sup>* mice do not have alterations in baseline control behaviors or with systemic administration of CP-94,253. A *Sert-Cre<sup>+/-</sup>:Arid1b<sup>flx/+</sup>* does not alter novel objection interaction ( $t_{39}=0.4200$ ,  $P=0.6768$ ,  $n=17-24$ ) or locomotion ( $t_{37}=0.1892$ ,  $P=0.8510$ ,  $n=17-22$ ). B Quantification of novel object interaction ( $F_{1,37}=0.4398$ ,  $P=0.5113$ ,  $n=17-22$ ) and locomotion ( $F_{1,37}=0.3338$ ,  $P=0.5669$ ,  $n=17-22$ ) in control and *Sert-Cre<sup>+/-</sup>:Arid1b<sup>flx/+</sup>* mice with systemic administration of vehicle or CP-94,253. Data are mean  $\pm$  s.e.m. Two-way ANOVA with Sidak's multiple comparison post hoc test.**

**Table 1 ASD Model and Control Genotypes**

| <b>Autism model</b>                                                     | <b>Autism model genotype cross</b>                                                                                                                                 | <b>Control genotype</b>                                                     |
|-------------------------------------------------------------------------|--------------------------------------------------------------------------------------------------------------------------------------------------------------------|-----------------------------------------------------------------------------|
| <i>Sert-Cre</i> <sup>+/-</sup> :16p11.2 <sup>flx/flx</sup>              | B6N.129P2(Cg)-Igs13 <sup>tm1Dolm</sup> Igs14 <sup>tm1Dolm</sup> /J ( <b>homozygous</b> , CD1 background) x Tg(Slc6a4-cre)ET33Gsat ( <b>heterozygous</b> , C57BL/6) | <i>Sert-Cre</i> <sup>-/-</sup> :16p11.2 <sup>flx/flx</sup> littermates      |
| <i>Cntnap2</i> <sup>-/-</sup>                                           | B6.129(Cg)- <i>Cntnap2</i> <sup>tm1Pele</sup> /J                                                                                                                   | <i>Cntnap2</i> <sup>+/+</sup> littermates                                   |
| Males: <i>Fmr1</i> <sup>-/y</sup> , Females: <i>Fmr1</i> <sup>-/-</sup> | B6.129P2- <i>Fmr1</i> <sup>tm1Cgr</sup> /J                                                                                                                         | Males: <i>Fmr1</i> <sup>+/y</sup> , Females: <i>Fmr1</i> <sup>+/+</sup>     |
| VPA                                                                     | C57BL/6 pups from pregnant females injected at E12.5 with 600mg/kg VPA                                                                                             | C57BL/6 pups from pregnant females injected at E12.5 with Saline            |
| <i>Actl6b</i> <sup>-/-</sup>                                            | B6.129S6- <i>Actl6b</i> <sup>tm1Grc</sup> /J                                                                                                                       | <i>Actl6b</i> <sup>+/+</sup>                                                |
| <i>Sert-Cre</i> <sup>+/-</sup> : <i>Arid1b</i> <sup>flx/+</sup>         | C57BL/6-Arid1bem2Hzhu/J ( <b>heterozygous</b> ) x Tg(Slc6a4-cre)ET33Gsat ( <b>heterozygous</b> )                                                                   | <i>Sert-Cre</i> <sup>-/-</sup> : <i>Arid1b</i> <sup>flx/+</sup> littermates |



**Table S2: Analysis of Experimentals Results by Sex**

| Figure | Autism Model                                            | Behavior             | Males   |             | Females |                         | Statistics         |               |                             |                      |         |
|--------|---------------------------------------------------------|----------------------|---------|-------------|---------|-------------------------|--------------------|---------------|-----------------------------|----------------------|---------|
|        |                                                         |                      | n (CON) | n (ASD)     | n (CON) | n (ASD)                 | Statistical test   | Post-hoc test | Factor                      | Test statistic       | p-value |
| 1B     | <i>Sert-Cre<sup>+/+</sup>;16p11.2<sup>flx/flx</sup></i> | Juvenile Interaction | 11      | 12          | 13      | 9                       | 2-way ANOVA        |               | Interaction                 | F (1, 41) = 0.9993   | 0.323   |
|        |                                                         |                      | 11      | 12          | 13      | 9                       | 2-way ANOVA        | Šídák's       | CON:Females vs. ASD:Females | t = 5.640, df = 41   | <0.0001 |
|        |                                                         |                      | 11      | 12          | 13      | 9                       | 2-way ANOVA        | Šídák's       | CON:Males vs. ASD:Males     | t = 7.30, df = 41    | <0.0001 |
|        |                                                         | 3-Chamber            | 11      | 12          | 13      | 9                       | 2-way ANOVA        |               | Interaction                 | F (1, 39) = 1.88     | 0.178   |
|        |                                                         |                      | 11      | 12          | 13      | 9                       | 2-way ANOVA        | Šídák's       | CON:Females vs. ASD:Females | t = 5.648, df = 39   | <0.0001 |
| 11     | 12                                                      | 13                   | 9       | 2-way ANOVA | Šídák's | CON:Males vs. ASD:Males | t = 5.869, df = 39 | <0.0001       |                             |                      |         |
| 1C     | <i>Cntnap2<sup>-/-</sup></i>                            | Juvenile Interaction | 9       | 14          | 9       | 9                       | 2-way ANOVA        |               | Interaction                 | F (1, 37) = 0.6227   | 0.4351  |
|        |                                                         |                      | 9       | 14          | 9       | 9                       | 2-way ANOVA        | Šídák's       | CON:Females vs. ASD:Females | t = 7.346, df = 37   | <0.0001 |
|        |                                                         |                      | 9       | 14          | 9       | 9                       | 2-way ANOVA        | Šídák's       | CON:Males vs. ASD:Males     | t = 2.202, df = 37   | <0.0001 |
|        |                                                         | 3-Chamber            | 9       | 14          | 9       | 9                       | 2-way ANOVA        |               | Interaction                 | F (1, 37) = 0.1064   | 0.7461  |
|        |                                                         |                      | 9       | 14          | 9       | 9                       | 2-way ANOVA        | Šídák's       | CON:Females vs. ASD:Females | t = 5.303, df = 37   | <0.0001 |
| 9      | 14                                                      | 9                    | 9       | 2-way ANOVA | Šídák's | CON:Males vs. ASD:Males | t = 6.337, df = 37 | <0.0001       |                             |                      |         |
| 1D     | <i>Fmr1<sup>dy/-</sup></i>                              | Juvenile Interaction | 10      | 10          | 10      | 10                      | 2-way ANOVA        |               | Interaction                 | F (1, 36) = 0.1695   | 0.683   |
|        |                                                         |                      | 10      | 10          | 10      | 10                      | 2-way ANOVA        | Šídák's       | CON:Females vs. ASD:Females | t = 11.83, df = 36   | <0.0001 |
|        |                                                         |                      | 10      | 10          | 10      | 10                      | 2-way ANOVA        | Šídák's       | CON:Males vs. ASD:Males     | t = 11.25, df = 36   | <0.0001 |
|        |                                                         | 3-Chamber            | 10      | 10          | 10      | 10                      | 2-way ANOVA        |               | Interaction                 | F (1, 36) = 0.002345 | 0.9616  |
|        |                                                         |                      | 10      | 10          | 10      | 10                      | 2-way ANOVA        | Šídák's       | CON:Females vs. ASD:Females | t = 3.486, df = 36   | 0.0078  |
| 10     | 10                                                      | 10                   | 10      | 2-way ANOVA | Šídák's | CON:Males vs. ASD:Males | t = 3.417, df = 36 | 0.0095        |                             |                      |         |
| 1E     | Valproic Acid                                           | Juvenile Interaction | 9       | 8           | 5       | 5                       | 2-way ANOVA        |               | Interaction                 | F (1, 23) = 0.7730   | 0.3884  |
|        |                                                         |                      | 9       | 8           | 5       | 5                       | 2-way ANOVA        | Šídák's       | CON:Females vs. ASD:Females | t = 3.681, df = 23   | 0.0074  |
|        |                                                         |                      | 9       | 8           | 5       | 5                       | 2-way ANOVA        | Šídák's       | CON:Males vs. ASD:Males     | t = 3.348, df = 23   | 0.0166  |
|        |                                                         | 3-Chamber            | 9       | 8           | 5       | 5                       | 2-way ANOVA        |               | Interaction                 | F (1, 23) = 3.428    | 0.077   |
|        |                                                         |                      | 9       | 8           | 5       | 5                       | 2-way ANOVA        | Šídák's       | CON:Females vs. ASD:Males   | t = 4.240, df = 23   | 0.0019  |
| 9      | 8                                                       | 5                    | 5       | 2-way ANOVA | Šídák's | CON:Males vs. ASD:Males | t = 4.865, df = 23 | 0.0004        |                             |                      |         |
| 1F     | <i>Sert-Cre<sup>+/+</sup>;16p11.2<sup>flx/flx</sup></i> | Novel Object         | 6       | 11          | 13      | 9                       | 2-way ANOVA        |               | Interaction                 | F (1, 35) = 0.02403  | 0.8777  |
|        |                                                         | Locomotion           | 6       | 11          | 13      | 9                       | 2-way ANOVA        |               | Interaction                 | F (1, 35) = 0.5608   | 0.459   |
| 1G     | <i>Cntnap2<sup>-/-</sup></i>                            | Novel Object         | 9       | 14          | 9       | 9                       | 2-way ANOVA        |               | Interaction                 | F (1, 37) = 0.01136  | 0.9157  |
|        |                                                         | Locomotion           | 9       | 14          | 9       | 9                       | 2-way ANOVA        |               | Interaction                 | F (1, 37) = 1.391    | 0.2457  |
| 1H     | <i>Fmr1<sup>dy/-</sup></i>                              | Novel Object         | 10      | 10          | 10      | 10                      | 2-way ANOVA        |               | Interaction                 | F (1, 36) = 0.01646  | 0.8986  |
|        |                                                         | Locomotion           | 10      | 10          | 10      | 10                      | 2-way ANOVA        |               | Interaction                 | F (1, 36) = 7.971    | 0.0077  |
| 1I     | Valproic Acid                                           | Novel Object         | 9       | 8           | 5       | 5                       | 2-way ANOVA        |               | Interaction                 | F (1, 23) = 0.3724   | 0.5477  |
|        |                                                         | Locomotion           | 9       | 8           | 5       | 5                       | 2-way ANOVA        |               | Interaction                 | F (1, 23) = 5.511    | 0.0279  |

|    |                                                     |                      |    |    |    |    |             |         |                             |                     |         |
|----|-----------------------------------------------------|----------------------|----|----|----|----|-------------|---------|-----------------------------|---------------------|---------|
| 2A | Sert-Cre <sup>+/+</sup> :16p11.2 <sup>flx/flx</sup> | Juvenile Interaction | 12 | 12 | 12 | 8  | 3-way ANOVA |         | Drug x Genotype             | F (1, 40) = 42.46   | <0.0001 |
|    |                                                     |                      | 12 | 12 | 12 | 8  | 3-way ANOVA |         | Drug x Sex                  | F (1, 40) = 1.101   | 0.3003  |
|    |                                                     |                      | 12 | 12 | 12 | 8  | 3-way ANOVA |         | Sex x Genotype              | F (1, 40) = 0.08675 | 0.7699  |
|    |                                                     |                      | 12 | 12 | 12 | 8  | 3-way ANOVA | Šídák's | saline:ASD-F vs. drug:ASD-F | t = 6.701, df = 40  | <0.0001 |
|    |                                                     |                      | 12 | 12 | 12 | 8  | 3-way ANOVA | Šídák's | saline:ASD-M vs. drug:ASD-M | t = 7.889, df = 40  | <0.0001 |
|    |                                                     | 3-Chamber            | 12 | 12 | 12 | 8  | 3-way ANOVA |         | Drug x Genotype             | F (1, 40) = 33.50   | <0.0001 |
|    |                                                     |                      | 12 | 12 | 12 | 8  | 3-way ANOVA |         | Drug x Sex                  | F (1, 40) = 1.686   | 0.2015  |
|    |                                                     |                      | 12 | 12 | 12 | 8  | 3-way ANOVA |         | Sex x Genotype              | F (1, 40) = 1.821   | 0.1848  |
|    |                                                     |                      | 12 | 12 | 12 | 8  | 3-way ANOVA | Šídák's | saline:ASD-F vs. drug:ASD-F | t = 9.569, df = 40  | <0.0001 |
|    |                                                     |                      | 12 | 12 | 12 | 8  | 3-way ANOVA | Šídák's | saline:ASD-M vs. drug:ASD-M | t = 8.137, df = 40  | <0.0001 |
| 2B | Cntnap2 <sup>-/-</sup>                              | Juvenile Interaction | 10 | 7  | 9  | 9  | 3-way ANOVA |         | Drug x Genotype             | F (1, 31) = 44.13   | <0.0001 |
|    |                                                     |                      | 10 | 7  | 9  | 9  | 3-way ANOVA |         | Drug x Sex                  | F (1, 31) = 0.1291  | 0.7218  |
|    |                                                     |                      | 10 | 7  | 9  | 9  | 3-way ANOVA |         | Sex x Genotype              | F (1, 31) = 0.2492  | 0.6211  |
|    |                                                     |                      | 10 | 7  | 9  | 9  | 3-way ANOVA | Šídák's | saline:ASD-F vs. drug:ASD-F | t = 6.696, df = 31  | <0.0001 |
|    |                                                     |                      | 10 | 7  | 9  | 9  | 3-way ANOVA | Šídák's | saline:ASD-M vs. drug:ASD-M | t = 5.232, df = 31  | 0.0001  |
|    |                                                     | 3-Chamber            | 10 | 7  | 9  | 9  | 3-way ANOVA |         | Drug x Genotype             | F (1, 31) = 2.043   | 0.1629  |
|    |                                                     |                      | 10 | 7  | 9  | 9  | 3-way ANOVA |         | Drug x Sex                  | F (1, 31) = 0.1695  | 0.6834  |
|    |                                                     |                      | 10 | 7  | 9  | 9  | 3-way ANOVA |         | Sex x Genotype              | F (1, 31) = 0.1187  | 0.7328  |
|    |                                                     |                      | 10 | 7  | 9  | 9  | 3-way ANOVA | Šídák's | saline:ASD-F vs. drug:ASD-F | t = 4.785, df = 31  | 0.0005  |
|    |                                                     |                      | 10 | 7  | 9  | 9  | 3-way ANOVA | Šídák's | saline:ASD-M vs. drug:ASD-M | t = 4.723, df = 31  | 0.0006  |
| 2C | Fmr1 <sup>-y,-/-</sup>                              | Juvenile Interaction | 9  | 9  | 10 | 10 | 3-way ANOVA |         | Drug x Genotype             | F (1, 34) = 118.0   | <0.0001 |
|    |                                                     |                      | 9  | 9  | 10 | 10 | 3-way ANOVA |         | Drug x Sex                  | F (1, 34) = 0.4894  | 0.489   |
|    |                                                     |                      | 9  | 9  | 10 | 10 | 3-way ANOVA |         | Sex x Genotype              | F (1, 34) = 0.9973  | 0.325   |
|    |                                                     |                      | 9  | 9  | 10 | 10 | 3-way ANOVA | Šídák's | saline:ASD-F vs. drug:ASD-F | t = 11.05, df = 34  | <0.0001 |
|    |                                                     |                      | 9  | 9  | 10 | 10 | 3-way ANOVA | Šídák's | saline:ASD-M vs. drug:ASD-M | t = 10.00, df = 34  | <0.0001 |
|    |                                                     | 3-Chamber            | 9  | 9  | 10 | 10 | 3-way ANOVA |         | Drug x Genotype             | F (1, 34) = 2.853   | 0.1003  |
|    |                                                     |                      | 9  | 9  | 10 | 10 | 3-way ANOVA |         | Drug x Sex                  | F (1, 34) = 1.963   | 0.1703  |
|    |                                                     |                      | 9  | 9  | 10 | 10 | 3-way ANOVA |         | Sex x Genotype              | F (1, 34) = 1.221   | 0.2769  |
|    |                                                     |                      | 9  | 9  | 10 | 10 | 3-way ANOVA | Šídák's | saline:ASD-F vs. drug:ASD-F | t = 3.542, df = 34  | 0.014   |
|    |                                                     |                      | 9  | 9  | 10 | 10 | 3-way ANOVA | Šídák's | saline:ASD-M vs. drug:ASD-M | t = 5.321, df = 34  | <0.0001 |
| 2D | Valproic Acid                                       | Juvenile Interaction | 9  | 8  | 8  | 7  | 3-way ANOVA |         | Drug x Genotype             | F (1, 28) = 162.2   | <0.0001 |
|    |                                                     |                      | 9  | 8  | 8  | 7  | 3-way ANOVA |         | Drug x Sex                  | F (1, 28) = 0.1133  | 0.7389  |
|    |                                                     |                      | 9  | 8  | 8  | 7  | 3-way ANOVA |         | Sex x Genotype              | F (1, 28) = 4.693   | 0.039   |
|    |                                                     |                      | 9  | 8  | 8  | 7  | 3-way ANOVA | Šídák's | saline:ASD-F vs. drug:ASD-F | t = 11.22, df = 28  | <0.0001 |
|    |                                                     |                      | 9  | 8  | 8  | 7  | 3-way ANOVA | Šídák's | saline:ASD-M vs. drug:ASD-M | t = 11.30, df = 28  | <0.0001 |
|    |                                                     | 3-Chamber            | 9  | 8  | 8  | 7  | 3-way ANOVA |         | Drug x Genotype             | F (1, 28) = 23.71   | <0.0001 |
|    |                                                     |                      | 9  | 8  | 8  | 7  | 3-way ANOVA |         | Drug x Sex                  | F (1, 28) = 0.7731  | 0.3867  |
|    |                                                     |                      | 9  | 8  | 8  | 7  | 3-way ANOVA |         | Sex x Genotype              | F (1, 28) = 0.9209  | 0.3454  |
|    |                                                     |                      | 9  | 8  | 8  | 7  | 3-way ANOVA | Šídák's | saline:ASD-F vs. drug:ASD-F | t = 5.900, df = 28  | <0.0001 |
|    |                                                     |                      | 9  | 8  | 8  | 7  | 3-way ANOVA | Šídák's | saline:ASD-M vs. drug:ASD-M | t = 7.181, df = 28  | <0.0001 |

|    |                                                     |                      |    |    |    |         |                               |                    |                               |                       |         |
|----|-----------------------------------------------------|----------------------|----|----|----|---------|-------------------------------|--------------------|-------------------------------|-----------------------|---------|
| 3A | Sert-Cre <sup>+/+</sup> :16p11.2 <sup>flx/flx</sup> | Juvenile Interaction | 11 | 12 | 13 | 9       | 3-way ANOVA                   |                    | Drug x Genotype               | F (1, 41) = 45.32     | <0.0001 |
|    |                                                     |                      | 11 | 12 | 13 | 9       | 3-way ANOVA                   |                    | Drug x Sex                    | F (1, 41) = 1.011     | 0.3205  |
|    |                                                     |                      | 11 | 12 | 13 | 9       | 3-way ANOVA                   |                    | Sex x Genotype                | F (1, 41) = 0.04931   | 0.8254  |
|    |                                                     |                      | 11 | 12 | 13 | 9       | 3-way ANOVA                   | Šídák's            | saline:ASD-F vs. drug:ASD-F   | t = 4.156, df = 41    | 0.0019  |
|    |                                                     |                      | 11 | 12 | 13 | 9       | 3-way ANOVA                   | Šídák's            | saline:ASD-M vs. drug:ASD-M   | t = 7.897, df = 41    | <0.0001 |
|    |                                                     | 3-Chamber            | 11 | 10 | 13 | 9       | 3-way ANOVA                   |                    | Drug x Genotype               | F (1, 39) = 32.91     | <0.0001 |
|    |                                                     |                      | 11 | 10 | 13 | 9       | 3-way ANOVA                   |                    | Drug x Sex                    | F (1, 39) = 0.06229   | 0.8042  |
|    |                                                     |                      | 11 | 10 | 13 | 9       | 3-way ANOVA                   |                    | Sex x Genotype                | F (1, 39) = 1.178     | 0.2845  |
|    |                                                     |                      | 11 | 10 | 13 | 9       | 3-way ANOVA                   | Šídák's            | saline:ASD-F vs. drug:ASD-F   | t = 5.382, df = 39    | <0.0001 |
|    |                                                     |                      | 11 | 10 | 13 | 9       | 3-way ANOVA                   | Šídák's            | saline:ASD-M vs. drug:ASD-M   | t = 5.233, df = 39    | <0.0001 |
| 3B | Cntnap2 <sup>-/-</sup>                              | Juvenile Interaction | 9  | 14 | 9  | 9       | 3-way ANOVA                   |                    | Drug x Genotype               | F (1, 37) = 27.99     | <0.0001 |
|    |                                                     |                      | 9  | 14 | 9  | 9       | 3-way ANOVA                   |                    | Drug x Sex                    | F (1, 37) = 0.6202    | 0.436   |
|    |                                                     |                      | 9  | 14 | 9  | 9       | 3-way ANOVA                   |                    | Sex x Genotype                | F (1, 37) = 0.1419    | 0.7085  |
|    |                                                     |                      | 9  | 14 | 9  | 9       | 3-way ANOVA                   | Šídák's            | saline:ASD-F vs. drug:ASD-F   | t = 4.922, df = 37    | 0.0002  |
|    |                                                     |                      | 9  | 14 | 9  | 9       | 3-way ANOVA                   | Šídák's            | saline:ASD-M vs. drug:ASD-M   | t = 7.024, df = 37    | <0.0001 |
|    |                                                     | 3-Chamber            | 9  | 14 | 9  | 9       | 3-way ANOVA                   |                    | Drug x Genotype               | F (1, 37) = 54.44     | <0.0001 |
|    |                                                     |                      | 9  | 14 | 9  | 9       | 3-way ANOVA                   |                    | Drug x Sex                    | F (1, 37) = 2.916     | 0.0961  |
|    |                                                     |                      | 9  | 14 | 9  | 9       | 3-way ANOVA                   |                    | Sex x Genotype                | F (1, 37) = 1.984     | 0.1673  |
|    |                                                     |                      | 9  | 14 | 9  | 9       | 3-way ANOVA                   | Šídák's            | saline:ASD-F vs. drug:ASD-F   | t = 9.196, df = 37    | <0.0001 |
|    |                                                     |                      | 9  | 14 | 9  | 9       | 3-way ANOVA                   | Šídák's            | saline:ASD-M vs. drug:ASD-M   | t = 6.590, df = 37    | <0.0001 |
| 3C | Fmr1 <sup>-y,-/-</sup>                              | Juvenile Interaction | 10 | 10 | 10 | 10      | 3-way ANOVA                   |                    | Drug x Genotype               | F (1, 36) = 67.46     | <0.0001 |
|    |                                                     |                      | 10 | 10 | 10 | 10      | 3-way ANOVA                   |                    | Drug x Sex                    | F (1, 36) = 7.340     | 0.0103  |
|    |                                                     |                      | 10 | 10 | 10 | 10      | 3-way ANOVA                   |                    | Sex x Genotype                | F (1, 36) = 0.3511    | 0.5572  |
|    |                                                     |                      | 10 | 10 | 10 | 10      | 3-way ANOVA                   | Šídák's            | saline:ASD-F vs. drug:ASD-F   | t = 10.15, df = 36    | <0.0001 |
|    |                                                     |                      | 10 | 10 | 10 | 10      | 3-way ANOVA                   | Šídák's            | saline:ASD-M vs. drug:ASD-M   | t = 5.540, df = 36    | <0.0001 |
|    |                                                     | 3-Chamber            | 9  | 9  | 10 | 10      | 3-way ANOVA                   |                    | Drug x Genotype               | F (1, 34) = 37.70     | <0.0001 |
|    |                                                     |                      | 9  | 9  | 10 | 10      | 3-way ANOVA                   |                    | Drug x Sex                    | F (1, 34) = 0.1109    | 0.7411  |
|    |                                                     |                      | 9  | 9  | 10 | 10      | 3-way ANOVA                   |                    | Sex x Genotype                | F (1, 34) = 0.1852    | 0.6697  |
|    |                                                     |                      | 9  | 9  | 10 | 10      | 3-way ANOVA                   | Šídák's            | saline:ASD-F vs. drug:ASD-F   | t = 5.383, df = 34    | <0.0001 |
|    |                                                     |                      | 9  | 9  | 10 | 10      | 3-way ANOVA                   | Šídák's            | saline:ASD-M vs. drug:ASD-M   | t = 5.743, df = 34    | <0.0001 |
| 3D | Valproic Acid                                       | Juvenile Interaction | 9  | 8  | 5  | 5       | 3-way ANOVA                   |                    | Drug x Genotype               | F (1, 23) = 9.261     | 0.0058  |
|    |                                                     |                      | 9  | 8  | 5  | 5       | 3-way ANOVA                   |                    | Drug x Sex                    | F (1, 23) = 0.0009178 | 0.9761  |
|    |                                                     |                      | 9  | 8  | 5  | 5       | 3-way ANOVA                   |                    | Sex x Genotype                | F (1, 23) = 0.2986    | 0.59    |
|    |                                                     |                      | 9  | 8  | 5  | 5       | 3-way ANOVA                   | Šídák's            | saline:CON-F vs. saline:ASD-F | t = 3.637, df = 46    | 0.0083  |
|    |                                                     |                      | 9  | 8  | 5  | 5       | 3-way ANOVA                   | Šídák's            | saline:CON_M vs. saline:ASD-M | t = 4.104, df = 46    | 0.002   |
|    |                                                     | 3-Chamber            | 9  | 7  | 5  | 5       | 3-way ANOVA                   |                    | Drug x Genotype               | F (1, 22) = 8.626     | 0.0076  |
|    |                                                     |                      | 9  | 7  | 5  | 5       | 3-way ANOVA                   |                    | Drug x Sex                    | F (1, 22) = 0.5671    | 0.4594  |
|    |                                                     |                      | 9  | 7  | 5  | 5       | 3-way ANOVA                   |                    | Sex x Genotype                | F (1, 22) = 0.7591    | 0.393   |
|    |                                                     |                      | 9  | 7  | 5  | 5       | 3-way ANOVA                   | Šídák's            | saline:ASD-M vs. drug:ASD-M   | t = 3.352, df = 22    | 0.034   |
|    |                                                     |                      | 9  | 7  | 5  | 5       | 3-way ANOVA                   | Šídák's            | saline:CON-F vs. saline:ASD-F | t = 3.758, df = 44    | 0.006   |
|    |                                                     |                      |    |    |    | Šídák's | saline:CON_M vs. saline:ASD-M | t = 4.630, df = 44 | 0.0004                        |                       |         |

|     |                                                                    |                      |    |    |    |    |             |         |                             |                      |         |
|-----|--------------------------------------------------------------------|----------------------|----|----|----|----|-------------|---------|-----------------------------|----------------------|---------|
| 4A  | <i>Act16b</i> <sup>-/-</sup>                                       | Juvenile Interaction | 9  | 7  | 11 | 10 | 2-way ANOVA |         | Interaction                 | F (1, 33) = 0.07653  | 0.7838  |
|     |                                                                    |                      | 9  | 7  | 11 | 10 | 2-way ANOVA | Šídák's | CON:Females vs. ASD:Females | t = 8.665, df = 33   | <0.0001 |
|     |                                                                    |                      | 9  | 7  | 11 | 10 | 2-way ANOVA | Šídák's | CON:Males vs. ASD:Males     | t = 7.879, df = 33   | <0.0001 |
|     |                                                                    | 3-Chamber            | 9  | 7  | 11 | 10 | 2-way ANOVA |         | Interaction                 | F (1, 33) = 0.3609   | 0.5521  |
|     |                                                                    |                      | 9  | 7  | 11 | 10 | 2-way ANOVA | Šídák's | CON:Females vs. ASD:Females | t = 11.60, df = 33   | <0.0001 |
|     |                                                                    |                      | 9  | 7  | 11 | 10 | 2-way ANOVA | Šídák's | CON:Males vs. ASD:Males     | t = 9.263, df = 33   | <0.0001 |
| 4B  | <i>Act16b</i> <sup>-/-</sup>                                       | Juvenile Interaction | 12 | 6  | 8  | 11 | 3-way ANOVA |         | Drug x Genotype             | F (1, 33) = 28.16    | <0.0001 |
|     |                                                                    |                      | 12 | 6  | 8  | 11 | 3-way ANOVA |         | Drug x Sex                  | F (1, 33) = 0.007671 | 0.9307  |
|     |                                                                    |                      | 12 | 6  | 8  | 11 | 3-way ANOVA |         | Sex x Genotype              | F (1, 33) = 0.5192   | 0.47363 |
|     |                                                                    |                      | 12 | 6  | 8  | 11 | 3-way ANOVA | Šídák's | saline:ASD-F vs. drug:ASD-F | t = 5.491, df = 33   | <0.0001 |
|     |                                                                    |                      | 12 | 6  | 8  | 11 | 3-way ANOVA | Šídák's | saline:ASD-M vs. drug:ASD-M | t = 4.659, df = 33   | 0.0006  |
| 4C  | <i>Act16b</i> <sup>-/-</sup>                                       | 3-Chamber            | 14 | 13 | 14 | 11 | 3-way ANOVA |         | Drug x Genotype             | F (1, 48) = 16.32    | 0.0002  |
|     |                                                                    |                      | 14 | 13 | 14 | 11 | 3-way ANOVA |         | Drug x Sex                  | F (1, 48) = 0.6479   | 0.4248  |
|     |                                                                    |                      | 14 | 13 | 14 | 11 | 3-way ANOVA |         | Sex x Genotype              | F (1, 48) = 0.04932  | 0.8252  |
|     |                                                                    |                      | 14 | 13 | 14 | 11 | 3-way ANOVA | Šídák's | saline:ASD-F vs. drug:ASD-F | t = 4.243, df = 48   | 0.0012  |
|     |                                                                    |                      | 14 | 13 | 14 | 11 | 3-way ANOVA | Šídák's | saline:ASD-M vs. drug:ASD-M | t = 5.112, df = 48   | <0.0001 |
| 4D  | <i>Sert-Cre</i> <sup>+/-</sup> ; <i>Arid1b</i> <sup>flx/+</sup>    | Juvenile Interaction | 14 | 12 | 10 | 5  | 2-way ANOVA |         | Interaction                 | F (1, 37) = 0.01947  | 0.8898  |
|     |                                                                    |                      | 14 | 12 | 10 | 5  | 2-way ANOVA | Šídák's | CON:Females vs. ASD:Females | t = 5.138, df = 37   | <0.0001 |
|     |                                                                    |                      | 14 | 12 | 10 | 5  | 2-way ANOVA | Šídák's | CON:Males vs. ASD:Males     | t = 6.914, df = 37   | <0.0001 |
|     |                                                                    | 3-Chamber            | 14 | 12 | 10 | 5  | 2-way ANOVA |         | Interaction                 | F (1, 37) = 0.2348   | 0.6308  |
|     |                                                                    |                      | 14 | 12 | 10 | 5  | 2-way ANOVA | Šídák's | CON:Females vs. ASD:Females | t = 3.924, df = 37   | 0.0022  |
|     |                                                                    |                      | 14 | 12 | 10 | 5  | 2-way ANOVA | Šídák's | CON:Males vs. ASD:Males     | t = 6.294, df = 37   | <0.0001 |
| 4E  | <i>Sert-Cre</i> <sup>+/-</sup> ; <i>Arid1b</i> <sup>flx/+</sup>    | Juvenile Interaction | 14 | 12 | 8  | 5  | 3-way ANOVA |         | Drug x Genotype             | F (1, 35) = 40.08    | <0.0001 |
|     |                                                                    |                      | 14 | 12 | 8  | 5  | 3-way ANOVA |         | Drug x Sex                  | F (1, 35) = 0.09725  | 0.757   |
|     |                                                                    |                      | 14 | 12 | 8  | 5  | 3-way ANOVA |         | Sex x Genotype              | F (1, 35) = 0.1138   | 0.7379  |
|     |                                                                    |                      | 14 | 12 | 8  | 5  | 3-way ANOVA | Šídák's | saline:ASD-F vs. drug:ASD-F | t = 4.431, df = 35   | 0.0011  |
|     |                                                                    |                      | 14 | 12 | 8  | 5  | 3-way ANOVA | Šídák's | saline:ASD-M vs. drug:ASD-M | t = 8.212, df = 35   | <0.0001 |
| 4F  | <i>Sert-Cre</i> <sup>+/-</sup> ; <i>Arid1b</i> <sup>flx/+</sup>    | 3-Chamber            | 14 | 12 | 8  | 5  | 3-way ANOVA |         | Drug x Genotype             | F (1, 35) = 22.49    | <0.0001 |
|     |                                                                    |                      | 14 | 12 | 8  | 5  | 3-way ANOVA |         | Drug x Sex                  | F (1, 35) = 0.2187   | 0.6429  |
|     |                                                                    |                      | 14 | 12 | 8  | 5  | 3-way ANOVA |         | Sex x Genotype              | F (1, 35) = 0.7598   | 0.3893  |
|     |                                                                    |                      | 14 | 12 | 8  | 5  | 3-way ANOVA | Šídák's | saline:ASD-F vs. drug:ASD-F | t = 4.194, df = 35   | 0.0021  |
|     |                                                                    |                      | 14 | 12 | 8  | 5  | 3-way ANOVA | Šídák's | saline:ASD-M vs. drug:ASD-M | t = 6.365, df = 35   | <0.0001 |
| S1A | <i>Sert-Cre</i> <sup>+/-</sup> ; <i>16p11.2</i> <sup>flx/flx</sup> | Novel Object         | 12 | 12 | 12 | 8  | 3-way ANOVA |         | Drug x Genotype             | F (1, 40) = 0.05997  | 0.8078  |
|     |                                                                    |                      | 12 | 12 | 12 | 8  | 3-way ANOVA |         | Drug x Sex                  | F (1, 40) = 0.6242   | 0.4342  |
|     |                                                                    |                      | 12 | 12 | 12 | 8  | 3-way ANOVA |         | Sex x Genotype              | F (1, 40) = 0.006668 | 0.9353  |
| S1B | <i>Cntnap2</i> <sup>-/-</sup>                                      | Novel Object         | 10 | 7  | 9  | 9  | 3-way ANOVA |         | Drug x Genotype             | F (1, 31) = 0.1562   | 0.6954  |
|     |                                                                    |                      | 10 | 7  | 9  | 9  | 3-way ANOVA |         | Drug x Sex                  | F (1, 31) = 1.647    | 0.2088  |
|     |                                                                    |                      | 10 | 7  | 9  | 9  | 3-way ANOVA |         | Sex x Genotype              | F (1, 31) = 0.8366   | 0.3674  |
| S1C | <i>Fmr1</i> <sup>+/y,-/-</sup>                                     | Novel Object         | 9  | 9  | 10 | 10 | 3-way ANOVA |         | Drug x Genotype             | F (1, 34) = 0.005500 | 0.9413  |
|     |                                                                    |                      | 9  | 9  | 10 | 10 | 3-way ANOVA |         | Drug x Sex                  | F (1, 34) = 0.005872 | 0.9394  |
|     |                                                                    |                      | 9  | 9  | 10 | 10 | 3-way ANOVA |         | Sex x Genotype              | F (1, 34) = 0.1865   | 0.6685  |
| S1D | Valproic Acid                                                      | Novel Object         | 9  | 8  | 8  | 7  | 3-way ANOVA |         | Drug x Genotype             | F (1, 28) = 0.04069  | 0.8416  |
|     |                                                                    |                      | 9  | 8  | 8  | 7  | 3-way ANOVA |         | Drug x Sex                  | F (1, 28) = 0.9374   | 0.3412  |
|     |                                                                    |                      | 9  | 8  | 8  | 7  | 3-way ANOVA |         | Sex x Genotype              | F (1, 28) = 1.192    | 0.2842  |

|     |                              |                              |   |   |   |   |             |         |                                |                        |         |
|-----|------------------------------|------------------------------|---|---|---|---|-------------|---------|--------------------------------|------------------------|---------|
| S2A | <i>Cntnap2<sup>-/-</sup></i> | Juvenile Interaction         | 7 |   | 7 |   | 3-way ANOVA |         | Dose x Sex                     | F (3, 72) = 0.05920    | 0.981   |
|     |                              |                              | 7 |   | 7 |   | 3-way ANOVA |         | Dose x Drug                    | F (3, 72) = 7.756      | 0.0001  |
|     |                              |                              | 7 |   | 7 |   | 3-way ANOVA |         | Sex x Drug                     | F (1, 24) = 0.5218     | 0.4771  |
|     |                              | Juvenile Interaction         | 7 |   | 7 |   | 3-way ANOVA |         | Dose x Sex                     | F (3, 72) = 0.9791     | 0.4075  |
|     |                              |                              | 7 |   | 7 |   | 3-way ANOVA |         | Dose x Drug                    | F (3, 72) = 141.9      | <0.0001 |
|     |                              |                              | 7 |   | 7 |   | 3-way ANOVA |         | Sex x Drug                     | F (1, 24) = 0.1707     | 0.6832  |
|     |                              |                              | 7 |   | 7 |   | 3-way ANOVA | Šídák's | 10mg/kg Saline-F vs. Agonist-F | t = 9.249, df = 10     | 0.0006  |
|     |                              |                              | 7 |   | 7 |   | 3-way ANOVA | Šídák's | 10mg/kg Saline-M vs. Agonist-M | t = 8.534, df = 10     | 0.0072  |
|     |                              |                              | 7 |   | 7 |   | 3-way ANOVA | Šídák's | 30mg/kg Saline-F vs. Saline-M  | t = 11.5, df = 10      | 0.0011  |
| S2B | <i>Cntnap2<sup>-/-</sup></i> | 3-Chamber                    | 8 |   | 7 |   | 3-way ANOVA |         | Dose x Sex                     | F (3, 78) = 0.01065    | 0.9985  |
|     |                              |                              | 8 |   | 7 |   | 3-way ANOVA |         | Dose x Drug                    | F (3, 78) = 1.292      | 0.283   |
|     |                              |                              | 8 |   | 7 |   | 3-way ANOVA |         | Sex x Drug                     | F (1, 26) = 0.003820   | 0.9512  |
|     |                              | 3-Chamber                    | 9 |   | 9 |   | 3-way ANOVA |         | Dose x Sex                     | F (3, 90) = 0.006087   | 0.9993  |
|     |                              |                              | 9 |   | 9 |   | 3-way ANOVA |         | Dose x Drug                    | F (3, 90) = 21.60      | <0.0001 |
|     |                              |                              | 9 |   | 9 |   | 3-way ANOVA |         | Sex x Drug                     | F (1, 30) = 0.007317   | 0.9324  |
|     |                              |                              | 9 |   | 9 |   | 3-way ANOVA | Šídák's | 10mg/kg Saline-F vs. Agonist-F | t = 6.99, df = 14      | 0.0008  |
|     |                              |                              | 9 |   | 9 |   | 3-way ANOVA | Šídák's | 10mg/kg Saline-M vs. Agonist-M | t = 5.962, df = 13     | 0.0072  |
|     |                              |                              | 9 |   | 9 |   | 3-way ANOVA | Šídák's | 30mg/kg Saline-F vs. Saline-M  | t = 6.497, df = 14     | 0.0018  |
| S2C | Valproic Acid                | Juvenile Interaction 1mg/kg  | 7 | 7 | 7 | 7 | 3-way ANOVA |         | Drug x Sex                     | F (1, 24) = 0.004838   | 0.9451  |
|     |                              |                              | 7 | 7 | 7 | 7 | 3-way ANOVA |         | Drug x Genotype                | F (1, 24) = 0.4113     | 0.5274  |
|     |                              |                              | 7 | 7 | 7 | 7 | 3-way ANOVA |         | Sex x Genotype                 | F (1, 24) = 0.2546     | 0.6184  |
|     |                              |                              | 7 | 7 | 7 | 7 | 3-way ANOVA | Šídák's | Saline-CON-F vs Saline-ASD-F   | t = 10.35, df = 48     | <0.0001 |
|     |                              |                              | 7 | 7 | 7 | 7 | 3-way ANOVA | Šídák's | Saline-CON-M vs Saline-ASD-M   | t = 9.603, df = 48     | <0.0001 |
|     |                              | Juvenile Interaction 3mg/kg  | 7 | 7 | 6 | 7 | 3-way ANOVA |         | Drug x Sex                     | F (1, 22) = 0.0006713  | 0.9796  |
|     |                              |                              | 7 | 7 | 6 | 7 | 3-way ANOVA |         | Drug x Genotype                | F (1, 22) = 12.04      | 0.0022  |
|     |                              |                              | 7 | 7 | 6 | 7 | 3-way ANOVA |         | Sex x Genotype                 | F (1, 22) = 2.755e-005 | 0.9959  |
|     |                              |                              | 7 | 7 | 6 | 7 | 3-way ANOVA | Šídák's | Saline-CON-F vs Saline-ASD-F   | t = 7.565, df = 44     | <0.0001 |
|     |                              |                              | 7 | 7 | 6 | 7 | 3-way ANOVA | Šídák's | Saline-CON-M vs Saline-ASD-M   | t = 8.072, df = 44     | <0.0001 |
|     |                              | Juvenile Interaction 10mg/kg | 7 | 7 | 7 | 7 | 3-way ANOVA |         | Drug x Sex                     | F (1, 24) = 0.6842     | 0.4163  |
|     |                              |                              | 7 | 7 | 7 | 7 | 3-way ANOVA |         | Drug x Genotype                | F (1, 24) = 92.62      | <0.0001 |
|     |                              |                              | 7 | 7 | 7 | 7 | 3-way ANOVA |         | Sex x Genotype                 | F (1, 24) = 0.6452     | 0.4297  |
|     |                              |                              | 7 | 7 | 7 | 7 | 3-way ANOVA | Šídák's | Saline-CON-F vs Saline-ASD-F   | t = 9.549, df = 48     | <0.0001 |
|     |                              |                              | 7 | 7 | 7 | 7 | 3-way ANOVA | Šídák's | Saline-CON-M vs Saline-ASD-M   | t = 10.27, df = 48     | <0.0001 |
|     |                              |                              | 7 | 7 | 7 | 7 | 3-way ANOVA | Šídák's | Saline-ASD-F vs Drug-ASD-F     | t = 9.891, df = 24     | <0.0001 |
|     |                              |                              | 7 | 7 | 7 | 7 | 3-way ANOVA | Šídák's | Saline-ASD-M vs Drug-ASD-M     | t = 9.190, df = 24     | <0.0001 |
|     |                              | Juvenile Interaction 30mg/kg | 7 | 7 | 6 | 7 | 3-way ANOVA |         | Drug x Sex                     | F (1, 22) = 0.003555   | 0.953   |
|     |                              |                              | 7 | 7 | 6 | 7 | 3-way ANOVA |         | Drug x Genotype                | F (1, 22) = 137.9      | <0.0001 |
|     |                              |                              | 7 | 7 | 6 | 7 | 3-way ANOVA |         | Sex x Genotype                 | F (1, 22) = 0.07603    | 0.7853  |
|     |                              |                              | 7 | 7 | 6 | 7 | 3-way ANOVA | Šídák's | Saline-CON-F vs Saline-ASD-F   | t = 10.38, df = 44     | <0.0001 |
|     |                              |                              | 7 | 7 | 6 | 7 | 3-way ANOVA | Šídák's | Saline-CON-M vs Saline-ASD-M   | t = 10.46, df = 44     | <0.0001 |
|     |                              |                              | 7 | 7 | 6 | 7 | 3-way ANOVA | Šídák's | Saline-ASD-F vs Drug-ASD-F     | t = 23.76, df = 22     | <0.0001 |
|     |                              |                              | 7 | 7 | 6 | 7 | 3-way ANOVA | Šídák's | Saline-ASD-M vs Drug-ASD-M     | t = 25.14, df = 22     | <0.0001 |

|     |                                                         |                   |    |    |             |         |                              |                    |                               |                      |         |
|-----|---------------------------------------------------------|-------------------|----|----|-------------|---------|------------------------------|--------------------|-------------------------------|----------------------|---------|
| S2D | Valproic Acid                                           | 1mg/kg_3-Chamber  | 7  | 7  | 7           | 7       | 3-way ANOVA                  |                    | Drug x Sex                    | F (1, 24) = 0.1048   | 0.7489  |
|     |                                                         |                   | 7  | 7  | 7           | 7       | 3-way ANOVA                  |                    | Drug x Genotype               | F (1, 24) = 0.001932 | 0.9653  |
|     |                                                         |                   | 7  | 7  | 7           | 7       | 3-way ANOVA                  |                    | Sex x Genotype                | F (1, 24) = 0.01212  | 0.9132  |
|     |                                                         |                   | 7  | 7  | 7           | 7       | 3-way ANOVA                  | Šídák's            | Saline-CON-F vs Saline-ASD-F  | t = 4.412, df = 48   | 0.0016  |
|     |                                                         |                   | 7  | 7  | 7           | 7       | 3-way ANOVA                  | Šídák's            | Saline-CON-M vs Saline-ASD-M  | t = 4.658, df = 48   | 0.0007  |
|     |                                                         | 3mg/kg_3-Chamber  | 7  | 7  | 6           | 7       | 3-way ANOVA                  |                    | Drug x Sex                    | F (1, 22) = 0.001859 | 0.966   |
|     |                                                         |                   | 7  | 7  | 6           | 7       | 3-way ANOVA                  |                    | Drug x Genotype               | F (1, 22) = 2.432    | 0.1332  |
|     |                                                         |                   | 7  | 7  | 6           | 7       | 3-way ANOVA                  |                    | Sex x Genotype                | F (1, 22) = 0.1253   | 0.7268  |
|     |                                                         |                   | 7  | 7  | 6           | 7       | 3-way ANOVA                  | Šídák's            | Saline-CON-F vs Saline-ASD-F  | t = 5.613, df = 44   | <0.0001 |
|     |                                                         |                   | 7  | 7  | 6           | 7       | 3-way ANOVA                  | Šídák's            | Saline-CON-M vs Saline-ASD-M  | t = 5.529, df = 44   | <0.0001 |
|     |                                                         | 10mg/kg_3-Chamber | 7  | 7  | 7           | 7       | 3-way ANOVA                  |                    | Drug x Sex                    | F (1, 24) = 0.1648   | 0.6884  |
|     |                                                         |                   | 7  | 7  | 7           | 7       | 3-way ANOVA                  |                    | Drug x Genotype               | F (1, 24) = 55.89    | <0.0001 |
|     |                                                         |                   | 7  | 7  | 7           | 7       | 3-way ANOVA                  |                    | Sex x Genotype                | F (1, 24) = 0.03053  | 0.8628  |
|     |                                                         |                   | 7  | 7  | 7           | 7       | 3-way ANOVA                  | Šídák's            | Saline-CON-F vs Saline-ASD-F  | t = 5.139, df = 48   | 0.0001  |
|     |                                                         |                   | 7  | 7  | 7           | 7       | 3-way ANOVA                  | Šídák's            | Saline-CON-M vs Saline-ASD-M  | t = 5.604, df = 48   | <0.0001 |
|     |                                                         |                   | 7  | 7  | 7           | 7       | 3-way ANOVA                  | Šídák's            | Saline-ASD-F vs Drug-ASD-F    | t = 7.332, df = 24   | <0.0001 |
|     |                                                         |                   | 7  | 7  | 7           | 7       | 3-way ANOVA                  | Šídák's            | Saline-ASD-M vs Drug-ASD-M    | t = 7.314, df = 24   | <0.0001 |
|     |                                                         | 30mg/kg_3-Chamber | 7  | 7  | 6           | 7       | 3-way ANOVA                  |                    | Drug x Sex                    | F (1, 22) = 0.003733 | 0.9518  |
|     |                                                         |                   | 7  | 7  | 6           | 7       | 3-way ANOVA                  |                    | Drug x Genotype               | F (1, 22) = 13.56    | 0.0013  |
|     |                                                         |                   | 7  | 7  | 6           | 7       | 3-way ANOVA                  |                    | Sex x Genotype                | F (1, 22) = 0.1680   | 0.6859  |
|     |                                                         |                   | 7  | 7  | 6           | 7       | 3-way ANOVA                  | Šídák's            | Saline-CON-F vs Saline-ASD-F  | t = 3.997, df = 44   | 0.0067  |
| 7   | 7                                                       |                   | 6  | 7  | 3-way ANOVA | Šídák's | Saline-CON-M vs Saline-ASD-M | t = 4.274, df = 44 | 0.0028                        |                      |         |
| 7   | 7                                                       |                   | 6  | 7  | 3-way ANOVA | Šídák's | Saline-ASD-F vs Drug-ASD-F   | t = 5.346, df = 22 | 0.0006                        |                      |         |
| 7   | 7                                                       |                   | 6  | 7  | 3-way ANOVA | Šídák's | Saline-ASD-M vs Drug-ASD-M   | t = 6.423, df = 22 | <0.0001                       |                      |         |
| S3B | <i>Cntnap2<sup>-/-</sup></i>                            | CPP               | 8  | 11 | 7           | 6       | 3-way ANOVA                  |                    | Test x Sex                    | F (1, 28) = 0.3109   | 0.5815  |
|     |                                                         |                   | 8  | 11 | 7           | 6       | 3-way ANOVA                  |                    | Test x Genotype               | F (1, 28) = 0.003460 | 0.9535  |
|     |                                                         |                   | 8  | 11 | 7           | 6       | 3-way ANOVA                  |                    | Sex x Genotype                | F (1, 28) = 2.264    | 0.1436  |
| S4A | <i>Sert-Cre<sup>+/+</sup>;16p11.2<sup>flx/flx</sup></i> | Locomotion        | 6  | 11 | 13          | 9       | 3-way ANOVA                  |                    | Drug x Genotype               | F (1, 35) = 0.3449   | 0.5608  |
|     |                                                         |                   | 6  | 11 | 13          | 9       | 3-way ANOVA                  |                    | Drug x Sex                    | F (1, 35) = 0.5986   | 0.4443  |
|     |                                                         |                   | 6  | 11 | 13          | 9       | 3-way ANOVA                  |                    | Sex x Genotype                | F (1, 35) = 0.3268   | 0.5712  |
| S4B | <i>Cntnap2<sup>-/-</sup></i>                            | Locomotion        | 9  | 14 | 9           | 9       | 3-way ANOVA                  |                    | Drug x Genotype               | F (1, 37) = 35.67    | <0.0001 |
|     |                                                         |                   | 9  | 14 | 9           | 9       | 3-way ANOVA                  |                    | Drug x Sex                    | F (1, 37) = 0.01902  | 0.8911  |
|     |                                                         |                   | 9  | 14 | 9           | 9       | 3-way ANOVA                  |                    | Sex x Genotype                | F (1, 37) = 0.1879   | 0.6672  |
|     |                                                         |                   | 9  | 14 | 9           | 9       | 3-way ANOVA                  | Šídák's            | saline:ASD-F vs. drug:ASD-F   | t = 5.523, df = 37   | <0.0001 |
|     |                                                         |                   | 9  | 14 | 9           | 9       | 3-way ANOVA                  | Šídák's            | saline:ASD-M vs. drug:ASD-M   | t = 5.461, df = 37   | <0.0001 |
| S4C | <i>Fmr1<sup>-y,-/-</sup></i>                            | Locomotion        | 10 | 10 | 10          | 10      | 3-way ANOVA                  |                    | Drug x Genotype               | F (1, 36) = 33.42    | <0.0001 |
|     |                                                         |                   | 10 | 10 | 10          | 10      | 3-way ANOVA                  |                    | Drug x Sex                    | F (1, 36) = 0.09303  | 0.7621  |
|     |                                                         |                   | 10 | 10 | 10          | 10      | 3-way ANOVA                  |                    | Sex x Genotype                | F (1, 36) = 3.428    | 0.0723  |
|     |                                                         |                   | 10 | 10 | 10          | 10      | 3-way ANOVA                  | Šídák's            | saline:ASD-F vs. drug:ASD-F   | t = 4.448, df = 36   | 0.001   |
|     |                                                         |                   | 10 | 10 | 10          | 10      | 3-way ANOVA                  | Šídák's            | saline:ASD-M vs. drug:ASD-M   | t = 3.942, df = 36   | 0.0043  |
| S4D | Valproic Acid                                           | Locomotion        | 9  | 8  | 5           | 5       | 3-way ANOVA                  |                    | Drug x Genotype               | F (1, 23) = 6.353    | 0.0191  |
|     |                                                         |                   | 9  | 8  | 5           | 5       | 3-way ANOVA                  |                    | Drug x Sex                    | F (1, 23) = 0.09447  | 0.7613  |
|     |                                                         |                   | 9  | 8  | 5           | 5       | 3-way ANOVA                  |                    | Sex x Genotype                | F (1, 23) = 6.134    | 0.021   |
|     |                                                         |                   | 9  | 8  | 5           | 5       | 3-way ANOVA                  | Šídák's            | saline:CON_M vs. saline:ASD-M | t = 3.03, df = 46    | 0.0469  |
| S5A | <i>Sert-Cre<sup>+/+</sup>;16p11.2<sup>flx/flx</sup></i> | Novel Object      | 6  | 11 | 13          | 9       | 3-way ANOVA                  |                    | Drug x Genotype               | F (1, 35) = 0.1535   | 0.6976  |
|     |                                                         |                   | 6  | 11 | 13          | 9       | 3-way ANOVA                  |                    | Drug x Sex                    | F (1, 35) = 0.2561   | 0.616   |
|     |                                                         |                   | 6  | 11 | 13          | 9       | 3-way ANOVA                  |                    | Sex x Genotype                | F (1, 35) = 0.1014   | 0.7521  |
| S5B | <i>Cntnap2<sup>-/-</sup></i>                            | Novel Object      | 9  | 14 | 9           | 9       | 3-way ANOVA                  |                    | Drug x Genotype               | F (1, 37) = 0.03463  | 0.8534  |
|     |                                                         |                   | 9  | 14 | 9           | 9       | 3-way ANOVA                  |                    | Drug x Sex                    | F (1, 37) = 0.07164  | 0.7904  |
|     |                                                         |                   | 9  | 14 | 9           | 9       | 3-way ANOVA                  |                    | Sex x Genotype                | F (1, 37) = 0.4193   | 0.5213  |
| S5C | <i>Fmr1<sup>-y,-/-</sup></i>                            | Novel Object      | 10 | 10 | 10          | 10      | 3-way ANOVA                  |                    | Drug x Genotype               | F (1, 36) = 0.01115  | 0.9165  |
|     |                                                         |                   | 10 | 10 | 10          | 10      | 3-way ANOVA                  |                    | Drug x Sex                    | F (1, 36) = 0.03267  | 0.8576  |

|     |                                                                 |              |    |    |    |    |             |         |                             |                       |         |
|-----|-----------------------------------------------------------------|--------------|----|----|----|----|-------------|---------|-----------------------------|-----------------------|---------|
|     |                                                                 |              | 10 | 10 | 10 | 10 | 3-way ANOVA |         | Sex x Genotype              | F (1, 36) = 0.8697    | 0.3572  |
| S5D | Valproic Acid                                                   | Novel Object | 9  | 8  | 5  | 5  | 3-way ANOVA |         | Drug x Genotype             | F (1, 23) = 0.01465   | 0.9047  |
|     |                                                                 |              | 9  | 8  | 5  | 5  | 3-way ANOVA |         | Drug x Sex                  | F (1, 23) = 0.6770    | 0.4191  |
|     |                                                                 |              | 9  | 8  | 5  | 5  | 3-way ANOVA |         | Sex x Genotype              | F (1, 23) = 0.2446    | 0.6256  |
|     |                                                                 |              | 9  | 8  | 5  | 5  | 3-way ANOVA |         | Sex x Genotype              | F (1, 23) = 0.2446    | 0.6256  |
| S6A | <i>Act16b</i> <sup>-/-</sup>                                    | Locomotion   | 7  | 7  | 7  | 9  | 3-way ANOVA |         | Drug x Genotype             | F (1, 26) = 27.86     | <0.0001 |
|     |                                                                 |              | 7  | 7  | 7  | 9  | 3-way ANOVA |         | Drug x Sex                  | F (1, 26) = 1.371     | 0.2523  |
|     |                                                                 |              | 7  | 7  | 7  | 9  | 3-way ANOVA |         | Sex x Genotype              | F (1, 26) = 0.8843    | 0.3557  |
|     |                                                                 |              | 7  | 7  | 7  | 9  | 3-way ANOVA | Šídák's | saline:ASD-F vs. drug:ASD-F | t = 4.213, df = 26    | 0.0032  |
|     |                                                                 |              | 7  | 7  | 7  | 9  | 3-way ANOVA | Šídák's | saline:ASD-M vs. drug:ASD-M | t = 4.599, df = 26    | 0.0012  |
| S6B | <i>Act16b</i> <sup>-/-</sup>                                    | Novel Object | 12 | 6  | 8  | 11 | 3-way ANOVA |         | Drug x Genotype             | F (1, 33) = 0.4949    | 0.4867  |
|     |                                                                 |              | 12 | 6  | 8  | 11 | 3-way ANOVA |         | Drug x Sex                  | F (1, 33) = 1.161     | 0.289   |
|     |                                                                 |              | 12 | 6  | 8  | 11 | 3-way ANOVA |         | Sex x Genotype              | F (1, 33) = 0.5300    | 0.4718  |
| S7A | <i>Sert-Cre</i> <sup>+/-</sup> : <i>Arid1b</i> <sup>flx/+</sup> | Novel Object | 14 | 12 | 10 | 5  | 2-way ANOVA |         | Interaction                 | F (1, 37) = 0.05852   | 0.8102  |
|     |                                                                 |              | 14 | 12 | 10 | 5  | 2-way ANOVA |         | Genotype                    | F (1, 37) = 0.2552    | 0.6165  |
|     |                                                                 |              | 14 | 12 | 10 | 5  | 2-way ANOVA |         | Sex                         | F (1, 37) = 0.1637    | 0.6881  |
|     |                                                                 | Locomotion   | 14 | 12 | 8  | 5  | 2-way ANOVA |         | Interaction                 | F (1, 35) = 2.108     | 0.1554  |
|     |                                                                 |              | 14 | 12 | 8  | 5  | 2-way ANOVA |         | Genotype                    | F (1, 35) = 0.6073    | 0.441   |
|     |                                                                 |              | 14 | 12 | 8  | 5  | 2-way ANOVA |         | Sex                         | F (1, 35) = 2.160     | 0.1506  |
| S7B | <i>Sert-Cre</i> <sup>+/-</sup> : <i>Arid1b</i> <sup>flx/+</sup> | Novel Object | 14 | 12 | 8  | 5  | 3-way ANOVA |         | Drug x Genotype             | F (1, 35) = 0.1814    | 0.6728  |
|     |                                                                 |              | 14 | 12 | 8  | 5  | 3-way ANOVA |         | Drug x Sex                  | F (1, 35) = 1.002     | 0.3238  |
|     |                                                                 |              | 14 | 12 | 8  | 5  | 3-way ANOVA |         | Sex x Genotype              | F (1, 35) = 1.128     | 0.2954  |
|     |                                                                 | Locomotion   | 14 | 12 | 8  | 5  | 3-way ANOVA |         | Drug x Genotype             | F (1, 35) = 0.2839    | 0.5975  |
|     |                                                                 |              | 14 | 12 | 8  | 5  | 3-way ANOVA |         | Drug x Sex                  | F (1, 35) = 0.0001173 | 0.9914  |
|     |                                                                 |              | 14 | 12 | 8  | 5  | 3-way ANOVA |         | Sex x Genotype              | F (1, 35) = 1.315     | 0.2593  |

**Table S3: Principal Component Analysis Loading Tables****Fig. 5A**

|                                  | <b>PC1</b> | <b>PC2</b>  | <b>PC3</b> | <b>PC4</b> |
|----------------------------------|------------|-------------|------------|------------|
| Juvenile interaction             | 0.3939387  | -0.72915424 | 0.1868903  | 0.5274641  |
| Novel object                     | 0.4076447  | 0.66436628  | 0.4193884  | 0.4653565  |
| 3-chamber                        | 0.4992497  | 0.14169781  | -0.8459347 | 0.1227434  |
| Open field                       | 0.6552769  | -0.08290525 | 0.2712561  | -0.7001135 |
| Proportion of variance explained | 0.3903     | 0.2729      | 0.2029     | 0.1338     |

**Fig. 5B**

|                                  | <b>PC1</b> | <b>PC2</b> | <b>PC3</b>  | <b>PC4</b>  |
|----------------------------------|------------|------------|-------------|-------------|
| Juvenile interaction             | -0.6109104 | 0.2732012  | 0.27931587  | -0.68857259 |
| Novel object                     | 0.2730455  | 0.7612845  | -0.56339974 | -0.16873895 |
| 3-chamber                        | -0.5903668 | 0.3993712  | 0.04386828  | 0.70003229  |
| Open field                       | 0.4513332  | 0.4316360  | 0.77629824  | 0.08573066  |
| Proportion of variance explained | 0.4544     | 0.2717     | 0.1761      | 0.09785     |

**Fig.5C**

|                                  | <b>PC1</b> | <b>PC2</b>  | <b>PC3</b> | <b>PC4</b>  |
|----------------------------------|------------|-------------|------------|-------------|
| Juvenile interaction             | -0.3491435 | -0.75148372 | 0.1285818  | 0.54482815  |
| Novel object                     | 0.7317828  | 0.05452042  | -0.2924698 | 0.61317449  |
| 3-chamber                        | -0.3338837 | -0.03965004 | -0.9406233 | -0.04666176 |
| Open field                       | 0.4807436  | -0.65629842 | -0.1146993 | -0.57008947 |
| Proportion of variance explained | 0.328      | 0.2908      | 0.2404     | 0.1409      |

**Fig.5D-E**

|                                  | <b>PC1</b> | <b>PC2</b> | <b>PC3</b> | <b>PC4</b> |
|----------------------------------|------------|------------|------------|------------|
| Juvenile interaction             | -0.5817174 | 0.3637999  | 0.3533411  | -0.6359281 |
| Novel object                     | 0.3726226  | 0.6552791  | -0.5882299 | -0.2928262 |
| 3-chamber                        | -0.5750399 | 0.4361641  | -0.2071580 | 0.6604358  |
| Open field                       | 0.4382766  | 0.4980158  | 0.6972956  | 0.2714272  |
| Proportion of variance explained | 0.4175     | 0.2655     | 0.1954     | 0.1216     |

These tables show the correlation between each of the principal components and each of the original variables, as well as the variance explained by each principal component.
